# Supplementary material for: Acute Mountain Sickness and the Risk of Subsequent Psychiatric Disorders—A Nationwide Cohort Study in Taiwan
Source: Int J Environ Res Public Health. 2023 Feb 6;20(4):2868. doi: 10.3390/ijerph20042868 (PMC9957283; doi:10.3390/ijerph20042868)
Supplement: Supplementary file 1 [file ijerph-20-02868-s001.zip › Table S1.pdf]

**Table S1.** Numbers of psychiatric disorders in the tracking of 16 years among the acute mountain sickness cohort and the control group.

| AMS                             | With (n = 127)                   | Without (n = 1270) | Log-Rank Test<br><i>p</i> |
|---------------------------------|----------------------------------|--------------------|---------------------------|
| In the Tracking of x<br>year(s) | Numbers of Psychiatric Disorders |                    |                           |
| 1                               | 21                               | 11                 | <0.001                    |
| 2                               | 29                               | 29                 | <0.001                    |
| 3                               | 31                               | 48                 | <0.001                    |
| 4                               | 36                               | 55                 | <0.001                    |
| 5                               | 39                               | 71                 | <0.001                    |
| 6                               | 40                               | 82                 | <0.001                    |
| 7                               | 41                               | 94                 | <0.001                    |
| 8                               | 43                               | 97                 | <0.001                    |
| 9                               | 44                               | 103                | <0.001                    |
| 10                              | 44                               | 110                | <0.001                    |
| 11                              | 46                               | 114                | <0.001                    |
| 12                              | 48                               | 122                | <0.001                    |
| 13                              | 49                               | 130                | <0.001                    |
| 14                              | 49                               | 134                | <0.001                    |
| 15                              | 49                               | 139                | <0.001                    |
| 16                              | 49                               | 140                | <0.001                    |

There was a significant difference of cumulative survival between the two cohorts in the psychiatric disorders (log-rank test,  $p < 0.001$ ). Abbreviations: AMS, Acute Mountain Sickness.
