# Supplementary material for: Acute Mountain Sickness and the Risk of Subsequent Psychiatric Disorders—A Nationwide Cohort Study in Taiwan
Source: Int J Environ Res Public Health. 2023 Feb 6;20(4):2868. doi: 10.3390/ijerph20042868 (PMC9957283; doi:10.3390/ijerph20042868)
Supplement: Supplementary file 1 [file ijerph-20-02868-s001.zip › Table S2.pdf]

**Table S2.** Sensitivity test for factors of the development of psychiatric disorders by the Fine & Gray's competing risk model among the acute mountain sickness cohort and the control group.

| Sensitivity test              | AMS                       | With   |                                | Without ( <i>Reference</i> ) |                                | Competing risk in the model |        |        |          |
|-------------------------------|---------------------------|--------|--------------------------------|------------------------------|--------------------------------|-----------------------------|--------|--------|----------|
|                               | Psychiatric disorders     | Events | Rate (per 10 <sup>5</sup> PYs) | Events                       | Rate (per 10 <sup>5</sup> PYs) | Adjusted sHR                | 95% CI | 95% CI | <i>p</i> |
| Overall                       | Overall                   | 49     | 4,175.58                       | 140                          | 1,126.19                       | 10.384                      | 7.267  | 14.838 | <0.001   |
|                               | Anxiety                   | 13     | 1,107.81                       | 22                           | 176.97                         | 17.531                      | 12.269 | 25.051 | <0.001   |
|                               | Depression                | 12     | 1,022.59                       | 17                           | 136.75                         | 20.943                      | 14.656 | 29.925 | <0.001   |
|                               | Bipolar                   | 4      | 340.86                         | 4                            | 32.18                          | 29.669                      | 20.763 | 42.394 | <0.001   |
|                               | Sleep disorders           | 10     | 852.16                         | 35                           | 281.55                         | 8.477                       | 5.932  | 12.113 | <0.001   |
|                               | PTSD / ASD                | 2      | 170.43                         | 1                            | 8.04                           | 59.337                      | 41.526 | 84.789 | <0.001   |
|                               | Psychotic disorders       | 2      | 170.43                         | 13                           | 104.57                         | 4.564                       | 3.194  | 6.522  | <0.001   |
|                               | Schizophrenia             | 1      | 85.22                          | 7                            | 56.31                          | 4.238                       | 2.966  | 6.056  | <0.001   |
|                               | Other psychotic disorders | 1      | 85.22                          | 6                            | 48.27                          | 4.945                       | 3.460  | 7.066  | <0.001   |
|                               | SRD                       | 13     | 1,107.81                       | 27                           | 217.19                         | 14.285                      | 9.997  | 20.412 | <0.001   |
|                               | AUD                       | 8      | 681.73                         | 23                           | 185.02                         | 10.320                      | 7.222  | 14.746 | <0.001   |
|                               | IDUD                      | 5      | 426.08                         | 4                            | 32.18                          | 37.086                      | 25.954 | 52.993 | <0.001   |
| In the first year excluded    | Overall                   | 28     | 2,452.13                       | 129                          | 1,046.05                       | 6.565                       | 4.594  | 9.381  | <0.001   |
|                               | Anxiety                   | 7      | 613.03                         | 18                           | 145.96                         | 11.763                      | 8.232  | 16.808 | <0.001   |
|                               | Depression                | 8      | 700.61                         | 16                           | 129.74                         | 15.123                      | 10.584 | 21.610 | <0.001   |
|                               | Bipolar                   | 1      | 87.58                          | 4                            | 32.44                          | 7.562                       | 5.292  | 10.805 | <0.001   |
|                               | Sleep disorders           | 9      | 788.18                         | 32                           | 259.49                         | 8.507                       | 5.953  | 12.156 | <0.001   |
|                               | PTSD / ASD                | 1      | 87.58                          | 1                            | 8.11                           | 30.247                      | 21.167 | 43.220 | <0.001   |
|                               | Psychotic disorders       | 2      | 175.15                         | 11                           | 89.20                          | 5.499                       | 3.849  | 7.858  | <0.001   |
|                               | Schizophrenia             | 1      | 87.58                          | 7                            | 56.76                          | 4.321                       | 3.024  | 6.174  | <0.001   |
|                               | Other psychotic disorders | 1      | 87.58                          | 4                            | 32.44                          | 7.562                       | 5.292  | 10.805 | <0.001   |
|                               | SRD                       | 5      | 437.88                         | 27                           | 218.94                         | 5.601                       | 3.920  | 8.004  | <0.001   |
|                               | AUD                       | 2      | 175.15                         | 23                           | 186.51                         | 2.630                       | 1.841  | 3.758  | <0.001   |
|                               | IDUD                      | 3      | 262.73                         | 4                            | 32.44                          | 22.685                      | 15.876 | 32.415 | <0.001   |
| In the first 5 years excluded | Overall                   | 10     | 1,317.55                       | 69                           | 630.71                         | 5.851                       | 4.094  | 8.360  | <0.001   |
|                               | Anxiety                   | 4      | 527.02                         | 7                            | 63.98                          | 23.068                      | 16.144 | 32.963 | <0.001   |
|                               | Depression                | 3      | 395.27                         | 10                           | 91.41                          | 12.111                      | 8.475  | 17.305 | <0.001   |
|                               | Sleep disorders           | 3      | 395.27                         | 21                           | 191.95                         | 5.767                       | 4.036  | 8.241  | <0.001   |
|                               | SRD                       | 2      | 263.51                         | 10                           | 91.41                          | 8.074                       | 5.650  | 11.537 | <0.001   |
|                               | AUD                       | 2      | 263.51                         | 10                           | 91.41                          | 8.074                       | 5.650  | 11.537 | <0.001   |

Abbreviations: AMS, Acute Mountain Sickness; Adjusted sHR, Adjusted sub-distribution Hazard ratio, Adjusted for the variables listed in Table 2 ; CI, confidence interval; PTSD/ASD, post-traumatic stress disorder/acute stress disorder; SRD, substance-related disorder; AUD, alcohol use disorder; IUD, illicit drug use disorder. Competing variable: all-cause mortality.
