# Supplementary material for: Acute Mountain Sickness and the Risk of Subsequent Psychiatric Disorders—A Nationwide Cohort Study in Taiwan
Source: Int J Environ Res Public Health. 2023 Feb 6;20(4):2868. doi: 10.3390/ijerph20042868 (PMC9957283; doi:10.3390/ijerph20042868)
Supplement: Supplementary file 1 [file ijerph-20-02868-s001.zip › Table S3.pdf]

**Table S3.** Years to the development of psychiatric disorders among the acute mountain sickness cohort and the control group.

| AMS     | Min  | Median | Max   | Mean ± SD   |
|---------|------|--------|-------|-------------|
| With    | 0.02 | 1.66   | 12.37 | 2.96 ± 3.56 |
| Without | 0.56 | 4.86   | 15.26 | 5.95 ± 4.23 |
| Total   | 0.02 | 4.15   | 15.26 | 5.17 ± 4.26 |

Abbreviations: AMS, Acute Mountain Sickness; SD, standard deviation.
