# Supplementary material for: Acute Mountain Sickness and the Risk of Subsequent Psychiatric Disorders—A Nationwide Cohort Study in Taiwan
Source: Int J Environ Res Public Health. 2023 Feb 6;20(4):2868. doi: 10.3390/ijerph20042868 (PMC9957283; doi:10.3390/ijerph20042868)
Supplement: Supplementary file 1 [file ijerph-20-02868-s001.zip › Table S4.pdf]

**Table S4.** Sensitivity test for factors of the development of psychiatric disorders by the Fine & Gray's competing risk model among the acute mountain sickness cohort and the control group.

| AMS              |                                | With   |                                | Without ( <i>Reference</i> ) |                                | <i>Competing risk in the model</i> |        |        |          |
|------------------|--------------------------------|--------|--------------------------------|------------------------------|--------------------------------|------------------------------------|--------|--------|----------|
| Sensitivity test | Psychiatric disorders          | Events | Rate (per 10 <sup>5</sup> PYs) | Events                       | Rate (per 10 <sup>5</sup> PYs) | Adjusted sHR                       | 95% CI | 95% CI | <i>P</i> |
| Overall          | Overall                        | 49     | 4,175.58                       | 140                          | 1,126.19                       | 10.384                             | 7.267  | 14.838 | <0.001   |
|                  | Single psychiatric diagnosis   | 21     | 1,789.54                       | 63                           | 506.78                         | 9.890                              | 6.921  | 14.131 | <0.001   |
|                  | Multiple psychiatric diagnoses | 28     | 2,386.05                       | 77                           | 619.40                         | 10.789                             | 7.550  | 15.416 | <0.001   |

Abbreviations: AMS, Acute Mountain Sickness; Adjusted sHR, Adjusted sub-distribution Hazard ratio, Adjusted for the variables listed in Table 2 ; CI, confidence interval; Competing variable: all-cause mortality.
